# Supplementary material
Source: publisher figshare collection journal article supplement (https://rs.figshare.com/ndownloader/files/14869508)
Supplement: Supplementary file 1 [file 14869508]

## Sheet: Genes in interesting cacti
Cactus	Entrez ID	Gene Name	Swissprot gene	Swissprot accession	Up or downregulated in sulfidic populations?
6	106914256	higd1a	HIG1A	Q9Y241	Upregulated
6	106917691	LOC106917691	ETHE1	O95571	Upregulated
6	106917689	LOC106917689	ETHE1	O95571	Upregulated
6	106922647	LOC106922647	CLD23	Q96B33	Upregulated
6	106924773	LOC106924773	N/A	N/A	Upregulated
6	106926034	LOC106926034	CLD5	O00501	Upregulated
6	106906225	slc31a2	COPT2	O15432	Upregulated
6	106907080	LOC106907080	CAH2	P00918	Upregulated
13	106924576	LOC106924576	KCP3	Q53RY4	Upregulated
13	106929368	slc26a5	S26A5	P58743	Upregulated
13	106904219	LOC106904219	COX15	Q7KZN9	Upregulated
13	106905247	LOC106905247	F162A	Q96A26	Upregulated
13	106906896	LOC106906896	THTM	P25325	Upregulated
13	106906895	LOC106906895	THTM	P25325	Upregulated
18	106932639	sqrdl	SQRD	Q9Y6N5	Upregulated
6	106919345	mavs	N/A	N/A	Downregulated
6	106922789	LOC106922789	BGAT	P16442	Downregulated
6	106924777	LOC106924777	ABHD2	P08910	Downregulated
6	106927938	hapln3	HPLN1	P10915	Downregulated
6	106903265	clcn2	CLCN2	P51788	Downregulated
13	106919345	mavs	N/A	N/A	Downregulated
13	106919378	LOC106919378	RFIP2	Q7L804	Downregulated
16	106916182	LOC106916182	INSR	P06213	Downregulated
18	106918988	LOC106918988	GIMA4	Q9NUV9	Downregulated
18	106904194	LOC106904194	CP2D6	P10635	Downregulated
18	106907102	LOC106907102	AGRF3	Q8IZF5	Downregulated
6	106914024	LOC106914024	CSPG4	Q6UVK1
6	106914123	LOC106914123	N/A	N/A
6	106914136	LOC106914136	S26A2	P50443
6	106914641	cdkn2d	CDN2D	P55273
6	106914655	LOC106914655	LRC8C	Q8TDW0
6	106914672	keap1	KEAP1	Q14145
6	106915115	cnnm3	CNNM3	Q8NE01
6	106915132	LOC106915132	N/A	N/A
6	106915132	LOC106915132	N/A	N/A
6	106915104	LOC106915104	N/A	N/A
6	106915549	cfap161	CO026	Q6P656
6	106915557	LOC106915557	SC5A7	Q9GZV3
6	106919353	pank2	PANK2	Q9BZ23
6	106919396	LOC106919396	SFXN5	Q8TD22
6	106919402	LOC106919402	EMX1	Q04741
6	106919683	LOC106919683	NMDE4	O15399
6	106920462	slc39a11	S39AB	Q8N1S5
6	106920870	prdx6	PRDX6	P30041
6	106920862	plpp6	PPAC2	Q8IY26
6	106923757	LOC106923757	CG057	Q8NEG2
6	106924438	LOC106924438	N/A	N/A
6	106924662	pqlc1	PQLC1	Q8N2U9
6	106924653	LOC106924653	KCNG1	Q9UIX4
6	106926974	LOC106926974	ABCC9	O60706
6	106927029	kcnj8	KCNJ8	Q15842
6	106927363	shroom2	SHRM2	Q13796
6	106927471	cldn34	CLD34	H7C241
6	106928632	LOC106928632	N/A	N/A
6	106928656	hipk2	HIPK2	Q9H2X6
6	106928663	LOC106928663	N/A	N/A
6	106928670	LOC106928670	K1549	Q9HCM3
6	106933076	LOC106933076	KAT7	O95251
6	106933118	aldh16a1	AL1L1	O75891
6	106932747	LOC106932747	FRIH	P02794
6	106904366	LOC106904366	DHE3	P00367
6	106904570	LOC106904570	HSPB1	P04792
6	106904774	LOC106904774	G3ST1	Q99999
6	106908361	LOC106908361	LPP	Q93052
6	106908408	LOC106908408	LPP	Q93052
6	106908550	LOC106908550	RAB6A	P20340
6	106908538	LOC106908538	SO2A1	Q92959
6	106908564	LOC106908564	SO2A1	Q92959
6	106908572	ryk	RYK	P34925
6	106909925	tm7sf3	TM7S3	Q9NS93
6	106911127	LOC106911127	PLB1	Q6P1J6
6	106913288	ephx4	EPHX4	Q8IUS5
6	106913270	brdt	BRD2	P25440
6	106913318	tgfbr3	TGBR3	Q03167
6	106913887	ptgs2	PGH2	P35354
6	106913918	inafm2	INAM2	P0DMQ5
6	106913919	plcb2	PLCB2	Q00722
6	106914096	LOC106914096	TIAM1	Q13009
6	106914099	LOC106914099	GRIK1	P39086
6	106914254	ccdc13	CCD13	Q8IYE1
6	106914255	LOC106914255	CP8B1	Q9UNU6
6	106914257	LOC106914257	CXG1	P36383
6	106914734	LOC106914734	TPRGL	Q5T0D9
6	106914741	atp1b1	AT1B1	P05026
6	106914982	bin3	BIN3	Q9NQY0
6	106915708	LOC106915708	N/A	N/A
6	106916021	LOC106916021	ASPH	Q12797
6	106916334	LOC106916334	RON	Q04912
6	106916670	LOC106916670	I13R2	Q14627
6	106916667	il13ra2	I13R2	Q14627
6	106916930	LOC106916930	MEFV	O15553
6	106917132	LOC106917132	DCLK2	Q8N568
6	106917289	LOC106917289	M3K14	Q99558
6	106917334	LOC106917334	LX15B	O15296
6	106917336	LOC106917336	H32	Q71DI3
6	106917335	LOC106917335	H13	P16402
6	106917319	LOC106917319	H2B1L	Q99880
6	106917501	LOC106917501	DNS2B	Q8WZ79
6	106917507	casp6	CASP6	P55212
6	106917508	pla2g12a	PG12A	Q9BZM1
6	106917506	dnajb14	DJB14	Q8TBM8
6	106917551	sirt7	SIR7	Q9NRC8
6	106917552	pcyt2	PCY2	Q99447
6	106917864	LOC106917864	PVRL2	Q92692
6	106918368	LOC106918368	CDK17	Q00537
6	106918726	LOC106918726	SMN	Q16637
6	106918727	hspb11	IFT25	Q9Y547
6	106918924	LOC106918924	FZD7	O75084
6	106918959	LOC106918959	DDX5	P17844
6	106918967	LOC106918967	ACOX1	Q15067
6	106918963	rhbdf2	RHDF2	Q6PJF5
6	106918989	prdm6	GIMA4	Q9NUV9
6	106919112	LOC106919112	PACR	P41586
6	106919113	LOC106919113	CYLD	Q9NQC7
6	106919310	acsl1	ACSL1	P33121
6	106919310	acsl1	ACSL1	P33121
6	106919311	primpol	PRIPO	Q96LW4
6	106919668	LOC106919668	KCNH5	Q8NCM2
6	106919668	LOC106919668	KCNH5	Q8NCM2
6	106919673	sgpp1	SGPP1	Q9BX95
6	106919970	LOC106919970	TUFT1	Q9NNX1
6	106920057	ace	ACE	P12821
6	106920545	dfnb59	PJVK	Q0ZLH3
6	106920543	LOC106920543	PWP2	Q15269
6	106920582	ccnb1	CCNB1	P14635
6	106920584	tmc2	TMC2	Q8TDI7
6	106920607	LOC106920607	PK3CA	P42336
6	106920608	LOC106920608	N/A	N/A
6	106920962	fnip1	FNIP1	Q8TF40
6	106920964	LOC106920964	N/A	N/A
6	106920965	LOC106920965	ACSL6	Q9UKU0
6	106920965	LOC106920965	ACSL6	Q9UKU0
6	106921214	nol10	NOL10	Q9BSC4
6	106921215	odc1	DCOR	P11926
6	106921209	LOC106921209	N/A	N/A
6	106921220	LOC106921220	TS1R1	Q7RTX1
6	106921324	LOC106921324	CEL3B	P08861
6	106921329	LOC106921329	SE1L3	Q68CR1
6	106921338	cdkl5	CDKL5	O76039
6	106921340	rs1	XLRS1	O15537
6	106922053	LOC106922053	SAMD1	Q6SPF0
6	106922057	prkaca	KAPCA	P17612
6	106922152	LOC106922152	ACHA5	P30532
6	106922147	LOC106922147	UD2A1	Q9Y4X1
6	106922464	col22a1	COMA1	Q8NFW1
6	106922464	col22a1	COMA1	Q8NFW1
6	106922504	LOC106922504	COX5B	P10606
6	106922583	slc26a6	S26A4	O43511
6	106922638	LOC106922638	GRB10	Q13322
6	106922643	LOC106922643	TNKS1	O95271
6	106922648	LOC106922648	N/A	N/A
6	106922649	LOC106922649	LRP1	Q07954
6	106922657	LOC106922657	ADAP1	O75689
6	106922663	LOC106922663	N/A	N/A
6	106922721	fam19a2	F19A2	Q8N3H0
6	106922723	slc16a7	MOT2	O60669
6	106922716	LOC106922716	N/A	N/A
6	106922725	rpap3	RPAP3	Q9H6T3
6	106922726	LOC106922726	MK12	P53778
6	106922728	LOC106922728	MK11	Q15759
6	106922787	rrp15	RRP15	Q9Y3B9
6	106922855	LOC106922855	LPAR1	Q92633
6	106922982	acaa1	THIK	P09110
6	106922985	LOC106922985	THIK	P09110
6	106922978	esf1	ESF1	Q9H501
6	106922983	ndufaf5	NDUF5	Q5TEU4
6	106922980	gas8	GAS8	O95995
6	106922976	kif16b	KIF1C	O43896
6	106922984	LOC106922984	N/A	N/A
6	106922986	snrpb2	RU2B	P08579
6	106922987	aplf	APLF	Q8IW19
6	106922989	fbxo48	FBX48	Q5FWF7
6	106922990	LOC106922990	CNRP1	Q96F85
6	106923296	LOC106923296	ACE	P12821
6	106923393	adrbk2	ARBK2	P35626
6	106923394	myo18b	LORF2	O00370
6	106923388	sez6l	SE6L1	Q9BYH1
6	106923389	LOC106923389	RL40	P62987
6	106923390	LOC106923390	S4A5	Q9BY07
6	106923391	LOC106923391	NK3R	P29371
6	106923392	scarb1	SCRB1	Q8WTV0
6	106923652	nr1d1	NR1D1	P20393
6	106923654	LOC106923654	WDR87	Q6ZQQ6
6	106923656	med15	MED15	Q96RN5
6	106923657	thoc6	THOC6	Q86W42
6	106923655	znf646	ZN479	Q96JC4
6	106923659	LOC106923659	ZN479	Q96JC4
6	106923658	LOC106923658	STX1B	P61266
6	106923684	LOC106923684	RP1	P56715
6	106923688	slc7a5	LAT1	Q01650
6	106923689	klhdc4	KLDC4	Q8TBB5
6	106923691	zcchc14	ZCHC2	Q9C0B9
6	106923693	LOC106923693	ZCH14	Q8WYQ9
6	106923692	LOC106923692	ZCH14	Q8WYQ9
6	106923794	LOC106923794	S4A4	Q9Y6R1
6	106923796	dck	DCK	P27707
6	106923889	LOC106923889	LORF2	O00370
6	106924071	LOC106924071	S12A4	Q9UP95
6	106924072	LOC106924072	COIA1	P39060
6	106924072	LOC106924072	COIA1	P39060
6	106924078	LOC106924078	LFG3	Q969X1
6	106924077	pnkd	N/A	N/A
6	106924076	tmbim1	LFG3	Q969X1
6	106924536	LOC106924536	GBG5	P63218
6	106924530	fuz	FUZZY	Q9BT04
6	106924579	mbd2	MBD2	Q9UBB5
6	106924581	LOC106924581	TBA1B	P68363
6	106924584	LOC106924584	N/A	N/A
6	106924585	LOC106924585	SPG16	Q8N0X2
6	106924582	wdr91	WDR91	A4D1P6
6	106924593	LOC106924593	LIFR	P42702
6	106924589	LOC106924589	LIFR	P42702
6	106924590	crat	CACP	P43155
6	106924592	ppp2r4	PTPA	Q15257
6	106924768	spata5l1	SPA5L	Q9BVQ7
6	106924772	LOC106924772	N/A	N/A
6	106924769	slc30a4	ZNT4	O14863
6	106924774	LOC106924774	MFGM	Q08431
6	106924779	LOC106924779	RLBP1	P12271
6	106924779	LOC106924779	RLBP1	P12271
6	106924780	tmem208	TM208	Q9BTX3
6	106924786	map2k5	MP2K5	Q13163
6	106924813	rell1	N/A	N/A
6	106924815	LOC106924815	N/A	N/A
6	106924962	LOC106924962	N/A	N/A
6	106925047	atg4b	ATG4B	Q9Y4P1
6	106925049	dtymk	KTHY	P23919
6	106925048	LOC106925048	SPYA	P21549
6	106925046	LOC106925046	N/A	N/A
6	106925050	LOC106925050	KIF1A	Q12756
6	106925054	scly	SCLY	Q96I15
6	106925055	LOC106925055	ZBED1	O96006
6	106925056	LOC106925056	ZBED1	O96006
6	106925057	LOC106925057	SNED1	Q8TER0
6	106925150	myo9a	MYO9A	B2RTY4
6	106925153	LOC106925153	SCAM2	O15127
6	106925154	bbs4	BBS4	Q96RK4
6	106925474	LOC106925474	AOFB	P27338
6	106925524	nrp1	NRP1	O14786
6	106925536	wdr7	WDR7	Q9Y4E6
6	106925536	wdr7	WDR7	Q9Y4E6
6	106925539	taf1c	TAF1C	Q15572
6	106925540	LOC106925540	CCNG2	Q16589
6	106925549	LOC106925549	CCNI	Q14094
6	106925541	LOC106925541	CCNI	Q14094
6	106925542	LOC106925542	SWAHB	A6NEL2
6	106925544	LOC106925544	SHRM3	Q8TF72
6	106925978	spop	SPOP	O43791
6	106926031	LOC106926031	CRBA4	P53673
6	106926032	LOC106926032	CRBB1	P53674
6	106926033	acads	ACADS	P16219
6	106926022	LOC106926022	Sept5	Q99719
6	106926396	LOC106926396	SO4A1	Q96BD0
6	106926412	hdlbp	VIGLN	Q00341
6	106926413	farp2	FARP2	O94887
6	106926414	bok	BOK	Q9UMX3
6	106926501	gpr119	GP119	Q8TDV5
6	106926493	LOC106926493	CLK4	Q9HAZ1
6	106926508	LOC106926508	RHG24	Q8N264
6	106926509	LOC106926509	P33MX	Q96A73
6	106926511	pof1b	POF1B	Q8WVV4
6	106926619	cbll1	HAKAI	Q75N03
6	106926620	scube1	SCUB1	Q8IWY4
6	106926620	scube1	SCUB1	Q8IWY4
6	106926668	spsb4	SPSB4	Q96A44
6	106926753	slc2a12	GTR12	Q8TD20
6	106926752	sgk1	SGK1	O00141
6	106926770	c6	CO6	P13671
6	106926773	LOC106926773	R7BP	Q6MZT1
6	106926771	LOC106926771	RN180	Q86T96
6	106926772	LOC106926772	5HT1A	P08908
6	106926775	LOC106926775	N/A	N/A
6	106927465	pgs1	PGPS1	Q32NB8
6	106927486	LOC106927486	TRAK2	O60296
6	106927485	nbeal1	NBEL1	Q6ZS30
6	106927577	gpr156	TRI27	P14373
6	106927788	LOC106927788	N/A	N/A
6	106927816	LOC106927816	N/A	N/A
6	106927817	kiaa0100	K0100	Q14667
6	106927821	kiaa0753	MOONR	Q2KHM9
6	106927939	LOC106927939	EDIL3	O43854
6	106927942	LOC106927942	PGCA	P16112
6	106928033	LOC106928033	N/A	N/A
6	106928031	syn3	TIMP3	P35625
6	106928064	tubgcp5	GCP5	Q96RT8
6	106928065	LOC106928065	N/A	N/A
6	106928066	chst7	CHST7	Q9NS84
6	106928049	slc9a7	SL9A7	Q96T83
6	106928052	LOC106928052	N/A	N/A
6	106928392	cetn2	CETN2	P41208
6	106928649	herc3	HERC3	Q15034
6	106929046	myl7	MYL5	Q02045
6	106929045	LOC106929045	GPAT3	Q53EU6
6	106929080	cadm1	CADM1	Q9BY67
6	106929085	LOC106929085	N/A	N/A
6	106929312	LOC106929312	TXTP	P53007
6	106929299	LOC106929299	PI4KA	P42356
6	106929299	LOC106929299	PI4KA	P42356
6	106929300	marveld2	MALD2	Q8N4S9
6	106929301	LOC106929301	OCLN	Q16625
6	106929304	LOC106929304	AN34B	A5PLL1
6	106929307	LOC106929307	VDAC3	Q9Y277
6	106929402	LOC106929402	HMCN1	Q96RW7
6	106929419	LOC106929419	CAN1	P07384
6	106929461	dcc	DCC	P43146
6	106929577	angel2	ANGE2	Q5VTE6
6	106929580	LOC106929580	VASH1	Q7L8A9
6	106902979	trnat-ugu	N/A	N/A
6	106929609	paqr4	PAQR4	Q8N4S7
6	106929605	LOC106929605	PERF	P14222
6	106929965	rfx2	RFX2	P48378
6	106929967	LOC106929967	ACBG1	Q96GR2
6	106930008	LOC106930008	N/A	N/A
6	106930007	LOC106930007	DNS2B	Q8WZ79
6	106930069	LOC106930069	GDPD5	Q8WTR4
6	106930323	LOC106930323	B3GT1	Q9Y5Z6
6	106930325	LOC106930325	B3GT1	Q9Y5Z6
6	106930569	LOC106930569	CHSP1	Q9Y2V2
6	106930624	LOC106930624	LIAT1	Q6ZQX7
6	106930662	tollip	TOLIP	Q9H0E2
6	106930661	LOC106930661	MUC5A	P98088
6	106930838	LOC106930838	NLTP	P22307
6	106931077	LOC106931077	N/A	N/A
6	106931214	LOC106931214	N/A	N/A
6	106931216	LOC106931216	ZN616	Q08AN1
6	106931212	LOC106931212	TESK2	Q96S53
6	106931403	LOC106931403	MYH6	P13533
6	106931554	tcf4	ITF2	P15884
6	106931625	LOC106931625	TM230	Q96A57
6	106931682	asz1	ASZ1	Q8WWH4
6	106932313	kank1	KANK1	Q14678
6	106932645	LOC106932645	UD2B4	P06133
6	106932708	LOC106932708	LORF2	O00370
6	106932707	pmvk	PMVK	Q15126
6	106932705	decr1	DECR	Q16698
6	106932700	LOC106932700	PNPH	P00491
6	106932702	LOC106932702	AN34A	Q69YU3
6	106932701	LOC106932701	IQGA3	Q86VI3
6	106932701	LOC106932701	IQGA3	Q86VI3
6	106932703	ttc24	TTC24	A2A3L6
6	106932709	LOC106932709	N/A	N/A
6	106932722	LOC106932722	SH319	Q5HYK7
6	106932810	tec	TEC	P42680
6	106932866	LOC106932866	MINK1	Q8N4C8
6	106932869	LOC106932869	IF5A1	P63241
6	106932870	LOC106932870	RL22L	Q6P5R6
6	106932868	LOC106932868	TRI16	O95361
6	106932867	LOC106932867	S7A14	Q8TBB6
6	106932874	LOC106932874	CLD11	O75508
6	106933005	tert	TERT	O14746
6	106933006	slc6a18	S6A18	Q96N87
6	106933007	LOC106933007	S6A19	Q695T7
6	106933417	LOC106933417	N/A	N/A
6	106933415	LOC106933415	LYAM1	P14151
6	106933416	LOC106933416	N/A	N/A
6	106933780	LOC106933780	N/A	N/A
6	106933778	lama4	LAMA4	Q16363
6	106933778	lama4	LAMA4	Q16363
6	106933782	tube1	TBE	Q9UJT0
6	106933783	wisp3	WISP3	O95389
6	106933781	LOC106933781	S22AD	Q9Y226
6	106933861	LOC106933861	ARI5B	Q14865
6	106933868	LOC106933868	RTKN	Q9BST9
6	106933864	LOC106933864	SMCA2	P51531
6	106933873	LOC106933873	PGBD4	Q96DM1
6	106933892	LOC106933892	NCEH1	Q6PIU2
6	106933885	LOC106933885	TNF10	P50591
6	106933876	LOC106933876	MSL2	Q9HCI7
6	106933943	nrbp2	NRBP	Q9UHY1
6	106933943	nrbp2	NRBP	Q9UHY1
6	106934005	LOC106934005	SAM9L	Q8IVG5
6	106934014	LOC106934014	NJMU	Q9HAS0
6	106903227	LOC106903227	N/A	N/A
6	106903226	LOC106903226	N/A	N/A
6	106903224	LOC106903224	STXB4	Q6ZWJ1
6	106903315	LOC106903315	PK1L2	Q7Z442
6	106903607	tnk2	ACK1	Q07912
6	106903609	LOC106903609	N/A	N/A
6	106903671	LOC106903671	T132D	Q14C87
6	106903671	LOC106903671	T132D	Q14C87
6	106903741	slc12a1	S12A1	Q13621
6	106903741	slc12a1	S12A1	Q13621
6	106903746	LOC106903746	S12A2	P55011
6	106903743	dut	DUT	P33316
6	106903740	fbn1	FBN1	P35555
6	106903770	LOC106903770	N/A	N/A
6	106903767	nmbr	NMBR	P28336
6	106904190	cpne2	CPNE2	Q96FN4
6	106904189	LOC106904189	NLRC5	Q86WI3
6	106904233	LOC106904233	PLCA	Q99943
6	106904269	LOC106904269	CNNM4	Q6P4Q7
6	106904270	LOC106904270	S14L2	O76054
6	106904266	LOC106904266	ZFY16	Q7Z3T8
6	106904266	LOC106904266	ZFY16	Q7Z3T8
6	106904268	ube2l3	UB2L3	P68036
6	106904267	LOC106904267	KCRS	P17540
6	106904272	LOC106904272	RGRF2	O14827
6	106904263	LOC106904263	NEUR3	Q9UQ49
6	106904603	exoc3	EXOC3	O60645
6	106904607	LOC106904607	N/A	N/A
6	106904608	LOC106904608	N/A	N/A
6	106904612	LOC106904612	TMPSD	Q9BYE2
6	106904611	LOC106904611	DQB1	P01920
6	106904681	LOC106904681	CLC1B	Q9P126
6	106904755	LOC106904755	N/A	N/A
6	106904756	LOC106904756	KMT2A	Q03164
6	106904758	cxxc1	CXXC1	Q9P0U4
6	106904760	LOC106904760	N/A	N/A
6	106904754	tfe3	TFE3	P19532
6	106904753	gnl3l	GNL3L	Q9NVN8
6	106905335	LOC106905335	N/A	N/A
6	106905336	LOC106905336	DPP9	Q86TI2
6	106905338	LOC106905338	DPP9	Q86TI2
6	106905337	rps15	RS15	P62841
6	106905343	cnn2	CNN2	Q99439
6	106905341	LOC106905341	MED26	O95402
6	106905340	LOC106905340	N/A	N/A
6	106905339	LOC106905339	CRTC1	Q6UUV9
6	106905344	LOC106905344	MAGI3	Q5TCQ9
6	106905350	LOC106905350	Sept2	Q15019
6	106905351	LOC106905351	N/A	N/A
6	106905347	LOC106905347	Sept2	Q15019
6	106905346	LOC106905346	N/A	N/A
6	106905598	LOC106905598	N/A	N/A
6	106905596	LOC106905596	OPSB	P03999
6	106905597	LOC106905597	OPSD	P08100
6	106905642	abca2	LORF2	O00370
6	106905649	LOC106905649	TPBG	Q13641
6	106905650	LOC106905650	TM222	Q9H0R3
6	106905651	LOC106905651	N/A	N/A
6	106905647	LOC106905647	MPRA	Q86WK9
6	106905705	fech	HEMH	P22830
6	106905703	onecut2	ONEC2	O95948
6	106905703	onecut2	ONEC2	O95948
6	106905746	LOC106905746	NLRC5	Q86WI3
6	106905748	LOC106905748	SYT13	Q7L8C5
6	106905747	LOC106905747	SYT13	Q7L8C5
6	106905743	uba2	SAE2	Q9UBT2
6	106905744	LOC106905744	CAH5B	Q9Y2D0
6	106905749	LOC106905749	LAT1N	Q8MH63
6	106905789	LOC106905789	RGS9	O75916
6	106905965	zfc3h1	ZC3H1	O60293
6	106905966	LOC106905966	GIMA5	Q96F15
6	106905973	LOC106905973	GIMA4	Q9NUV9
6	106905984	dapk1	DAPK1	P53355
6	106906105	LOC106906105	NR4A1	P22736
6	106906100	LOC106906100	TANK	Q92844
6	106906223	LOC106906223	NIBL1	Q96TA1
6	106906224	arrdc1	ARRD1	Q8N5I2
6	106906224	arrdc1	ARRD1	Q8N5I2
6	106906681	fsd1l	FSD1	Q9BTV5
6	106906682	LOC106906682	APC	P25054
6	106906699	phf2	PHF2	O75151
6	106906893	LOC106906893	C1QT1	Q9BXJ1
6	106907039	LOC106907039	GGT5	P36269
6	106907155	LOC106907155	N/A	N/A
6	106907371	LOC106907371	GSTO1	P78417
6	106907428	crtc2	CRTC2	Q53ET0
6	106907426	dennd4b	DEN4B	O75064
6	106907430	LOC106907430	N/A	N/A
6	106907427	LOC106907427	K0319	Q5VV43
6	106907429	aldh5a1	SSDH	P51649
6	106907499	LOC106907499	N/A	N/A
6	106907498	tyw3	PGBD3	Q8N328
6	106907497	LOC106907497	N/A	N/A
6	106907500	LOC106907500	N/A	N/A
6	106907517	LOC106907517	ANX11	P50995
6	106907522	LOC106907522	APBA1	Q02410
6	106907521	apba1	APBA1	Q02410
6	106907519	tjp2	ZO2	Q9UDY2
6	106907519	tjp2	ZO2	Q9UDY2
6	106907617	LOC106907617	N/A	N/A
6	106907615	LOC106907615	WIPF2	Q8TF74
6	106907614	utp18	UTP18	Q9Y5J1
6	106907613	LOC106907613	TRI25	Q14258
6	106907618	ube2m	UBC12	P61081
6	106907612	LOC106907612	FXL19	Q6PCT2
6	106907619	LOC106907619	IMB1	Q14974
6	106907978	LOC106907978	CPNE4	Q96A23
6	106907979	LOC106907979	POGZ	Q7Z3K3
6	106908087	LOC106908087	N/A	N/A
6	106908096	LOC106908096	FHDC1	Q9C0D6
6	106908101	LOC106908101	ARFP1	P53367
6	106908130	xkr4	XKR4	Q5GH76
6	106908225	LOC106908225	ZN831	Q5JPB2
6	106908608	LOC106908608	N/A	N/A
6	106908613	LOC106908613	KPCD3	O94806
6	106908619	LOC106908619	CNTP2	Q9UHC6
6	106908677	LOC106908677	P4K2A	Q9BTU6
6	106908688	LOC106908688	CRTC1	Q6UUV9
6	106908688	LOC106908688	CRTC1	Q6UUV9
6	106908689	LOC106908689	RTL1	A6NKG5
6	106908781	LOC106908781	ASZ1	Q8WWH4
6	106908779	LOC106908779	WNT2	P09544
6	106909114	ugcg	CEGT	Q16739
6	106909115	LOC106909115	MOC2B	O96007
6	106909116	LOC106909116	MOC2A	O96033
6	106909282	selenbp1	SBP1	Q13228
6	106909281	LOC106909281	ASTE1	Q2TB18
6	106909302	LOC106909302	SMAD4	Q13485
6	106909305	LOC106909305	N/A	N/A
6	106909304	LOC106909304	AN32A	P39687
6	106909303	LOC106909303	PKHO1	Q53GL0
6	106909306	LOC106909306	PKHO1	Q53GL0
6	106909592	LOC106909592	SYT2	Q8N9I0
6	106909594	LOC106909594	TNNT3	P45378
6	106909602	LOC106909602	CRTC1	Q6UUV9
6	106909604	gdf15	GDF15	Q99988
6	106909723	nags	NAGS	Q8N159
6	106909727	LOC106909727	N/A	N/A
6	106909724	LOC106909724	N/A	N/A
6	106909726	LOC106909726	N/A	N/A
6	106909787	LOC106909787	N/A	N/A
6	106909788	LOC106909788	CNTP2	Q9UHC6
6	106910000	LOC106910000	TGS1	Q96RS0
6	106910107	dnajc27	DJC27	Q9NZQ0
6	106910104	LOC106910104	ADCY8	P40145
6	106910276	LOC106910276	SC31A	O94979
6	106910279	LOC106910279	SCD5	Q86SK9
6	106910281	LOC106910281	DJB12	Q9NXW2
6	106910473	lrrc2	LRRC2	Q9BYS8
6	106910475	LOC106910475	N/A	N/A
6	106911053	LOC106911053	SMUF2	Q9HAU4
6	106911595	LOC106911595	MYO1E	Q12965
6	106911596	LOC106911596	PI4KB	Q9UBF8
6	106912401	LOC106912401	N/A	N/A
6	106912803	LOC106912803	MUC2	Q02817
6	106912833	LOC106912833	O13C8	Q8NGS7
13	106915224	LOC106915224	PARG	Q86W56
13	106915771	polr3d	RPC4	P05423
13	106915780	LOC106915780	PHIPL	Q96FC7
13	106918601	LOC106918601	RS16	P62249
13	106918589	rps16	RS16	P62249
13	106919044	tmem206	TM206	Q9H813
13	106919058	nenf	NENF	Q9UMX5
13	106919117	LOC106919117	EZRI	P15311
13	106919084	LOC106919084	EZRI	P15311
13	106918957	LOC106918957	GP151	Q8TDV0
13	106918965	LOC106918965	N/A	N/A
13	106920462	slc39a11	S39AB	Q8N1S5
13	106921840	LOC106921840	N/A	N/A
13	106923412	LOC106923412	KLH31	Q9H511
13	106923458	LOC106923458	S17A5	Q9NRA2
13	106923480	LOC106923480	MYCBP	Q99417
13	106923472	LOC106923472	CXA9	P57773
13	106923488	srsf10	SRS12	Q8WXF0
13	106923253	LOC106923253	FABPL	P07148
13	106923528	LOC106923528	SL9A1	P19634
13	106923507	cfap69	CFA69	A5D8W1
13	106923559	LOC106923559	CD5R1	Q15078
13	106925824	LOC106925824	AACS	Q86V21
13	106925828	LOC106925828	GAK	O14976
13	106925797	gak	AUXI	O75061
13	106926642	gdpd2	GDPD4	Q6W3E5
13	106927570	LOC106927570	N/A	N/A
13	106927576	LOC106927576	CBS	P35520
13	106928670	LOC106928670	K1549	Q9HCM3
13	106928687	LOC106928687	MICA3	Q7RTP6
13	106904476	LOC106904476	NCAM1	P13591
13	106909352	LOC106909352	CYTA	P01040
13	106909344	LOC106909344	CYTA	P01040
13	106909314	cpa6	CBPA6	Q8N4T0
13	106909881	arid2	ARID2	Q68CP9
13	106911127	LOC106911127	PLB1	Q6P1J6
13	106911137	LOC106911137	N/A	N/A
13	106911204	LOC106911204	YPEL5	P62699
13	106914671	steap3	STEA2	Q8NFT2
13	106914752	gabrg3	GBRG3	Q99928
13	106914768	LOC106914768	N/A	N/A
13	106914820	prim2	PRI2	P49643
13	106915798	vegfb	STX5	Q13190
13	106916519	gbf1	GBF1	Q92538
13	106917300	myrfl	MRFL	Q96LU7
13	106917303	cct2	TCPB	P78371
13	106917688	phldb3	PHLB2	Q86SQ0
13	106917920	mettl22	MET22	Q9BUU2
13	106917921	LOC106917921	YIPF1	Q9Y548
13	106917923	LOC106917923	CS052	Q9BSF4
13	106917924	LOC106917924	N/A	N/A
13	106918097	abcb7	ABCB7	O75027
13	106918099	uprt	UPP	Q96BW1
13	106918320	LOC106918320	NPDC1	Q9NQX5
13	106918363	LOC106918363	BMPR2	Q13873
13	106918362	LOC106918362	KBTBC	Q3ZCT8
13	106918815	LOC106918815	RGS21	Q2M5E4
13	106918963	rhbdf2	RHDF2	Q6PJF5
13	106918970	sphk1	SPHK1	Q9NYA1
13	106919037	LOC106919037	DYN3	Q9UQ16
13	106919999	LOC106919999	TCEA3	O75764
13	106920137	evi5	EVI5	O60447
13	106920176	LOC106920176	QPCT	Q16769
13	106920522	LOC106920522	DOC11	Q5JSL3
13	106920731	LOC106920731	MGT4C	Q9UBM8
13	106920963	LOC106920963	RPGF6	Q8TEU7
13	106920989	LOC106920989	N/A	N/A
13	106921101	LOC106921101	CADM2	Q8N3J6
13	106921206	LOC106921206	SO5A1	Q9H2Y9
13	106921328	LOC106921328	NPT2A	Q06495
13	106921526	LOC106921526	ARI1A	O14497
13	106921522	LOC106921522	N/A	N/A
13	106921751	LOC106921751	CV039	Q6P5X5
13	106921750	mrpl40	RM40	Q9NQ50
13	106921746	acaa2	THIM	P42765
13	106922060	LOC106922060	CO3	P01024
13	106922151	LOC106922151	UD2A1	Q9Y4X1
13	106922152	LOC106922152	ACHA5	P30532
13	106922457	LOC106922457	TPPC9	Q96Q05
13	106922457	LOC106922457	TPPC9	Q96Q05
13	106922578	LOC106922578	KAP2	P13861
13	106922746	LOC106922746	N/A	N/A
13	106922743	LOC106922743	ANGL1	O95841
13	106922741	LOC106922741	DPP9	Q86TI2
13	106922992	LOC106922992	PKHA7	Q6IQ23
13	106923241	LOC106923241	N/A	N/A
13	106923245	LOC106923245	BT2A1	Q7KYR7
13	106923432	LOC106923432	N/A	N/A
13	106923732	LOC106923732	LHX6	Q9UPM6
13	106924321	frmpd2	FRPD2	Q68DX3
13	106924329	mapk8	MK08	P45983
13	106924578	LOC106924578	UCKL1	Q9NWZ5
13	106924665	LOC106924665	APMAP	Q9HDC9
13	106924666	LOC106924666	UBP33	Q8TEY7
13	106924903	LOC106924903	PK1L2	Q7Z442
13	106924904	dhodh	PYRD	Q02127
13	106925021	LOC106925021	NRCAM	Q92823
13	106926003	LOC106926003	ADRB2	P07550
13	106926396	LOC106926396	SO4A1	Q96BD0
13	106926398	LOC106926398	TRI62	Q9BVG3
13	106926397	LOC106926397	TRI62	Q9BVG3
13	106926703	LOC106926703	PITC1	Q9UKF7
13	106926799	tbc1d2b	TBD2B	Q9UPU7
13	106926806	dapk2	DAPK3	O43293
13	106926955	LOC106926955	OXSR1	O95747
13	106926956	LOC106926956	PLCD1	P51178
13	106926964	LOC106926964	MUL1	Q969V5
13	106926962	eif2b5	EI2BE	Q13144
13	106927215	tmem94	K0195	Q12767
13	106927821	kiaa0753	MOONR	Q2KHM9
13	106928004	LOC106928004	IMPG2	Q9BZV3
13	106928301	LOC106928301	GP158	Q5T848
13	106928748	LOC106928748	PRS27	Q9BQR3
13	106928747	LOC106928747	PRS27	Q9BQR3
13	106928780	basp1	N/A	N/A
13	106928922	aff2	AFF2	P51816
13	106929055	LOC106929055	PHAR4	Q8IZ21
13	106929056	LOC106929056	N/A	N/A
13	106929049	LOC106929049	EDN2	P20800
13	106929513	LOC106929513	TAAR6	Q96RI8
13	106929528	LOC106929528	VEGFD	O43915
13	106930194	LOC106930194	REEP5	Q00765
13	106930195	LOC106930195	REEP5	Q00765
13	106930477	apeh	ACPH	P13798
13	106930470	LOC106930470	N/A	N/A
13	106931382	LOC106931382	N/A	N/A
13	106931387	LOC106931387	PKHF1	Q96S99
13	106931524	LOC106931524	K1C14	P02533
13	106932143	ankrd16	ANR16	Q6P6B7
13	106902986	trnay-gua	N/A	N/A
13	106932131	glt8d2	GL8D2	Q9H1C3
13	106932389	rrp36	RRP36	Q96EU6
13	106932396	slc22a7	S22A7	Q9Y694
13	106932504	LOC106932504	UBP22	Q9UPT9
13	106932559	eftud1	ETUD1	Q7Z2Z2
13	106932560	LOC106932560	ETUD1	Q7Z2Z2
13	106932801	iqcj	N/A	N/A
13	106932962	LOC106932962	N/A	N/A
13	106932967	LOC106932967	N/A	N/A
13	106933075	LOC106933075	VATB2	P21281
13	106933308	LOC106933308	PACS1	Q6VY07
13	106902956	trnal-caa	N/A	N/A
13	106933811	LOC106933811	S4A10	Q6U841
13	106933859	LOC106933859	JAK2	O60674
13	106933967	LOC106933967	TDG	Q13569
13	106933968	LOC106933968	PLPL2	Q96AD5
13	106933962	LOC106933962	PLPL2	Q96AD5
13	106903599	xpo4	XPO4	Q9C0E2
13	106903741	slc12a1	S12A1	Q13621
13	106903746	LOC106903746	S12A2	P55011
13	106903775	fam102b	F102B	Q5T8I3
13	106903776	slc25a24	SCMC1	Q6NUK1
13	106903978	LOC106903978	GRM4	Q14833
13	106904220	cutc	CUTC	Q9NTM9
13	106904222	LOC106904222	N/A	N/A
13	106904221	LOC106904221	KCIP2	Q9NS61
13	106904629	ppia	PPIF	P30405
13	106904631	zmiz2	ZMIZ2	Q8NF64
13	106905246	kpna1	IMA5	P52294
13	106905252	ccdc58	CCD58	Q4VC31
13	106905645	trappc9	TPPC9	Q96Q05
13	106906164	LOC106906164	MPP4	Q96JB8
13	106906707	emp2	EMP2	P54851
13	106906715	pbld	PBLD	P30039
13	106906887	LOC106906887	TPBG	Q13641
13	106906880	LOC106906880	COA4	Q9NYJ1
13	106906978	LOC106906978	N/A	N/A
13	106907824	LOC106907824	NEUA	Q8NFW8
13	106907823	LOC106907823	NEUA	Q8NFW8
13	106907890	il34	N/A	N/A
13	106907965	LOC106907965	N/A	N/A
13	106907961	LOC106907961	N/A	N/A
13	106907964	LOC106907964	N/A	N/A
13	106908056	LOC106908056	MPP7	Q5T2T1
13	106908494	LOC106908494	ANGL5	Q86XS5
13	106910893	LOC106910893	VMAT2	Q05940
13	106910894	LOC106910894	N/A	N/A
13	106911142	LOC106911142	RTL1	A6NKG5
13	106911808	LOC106911808	CGAS	Q8N884
13	106911811	LOC106911811	EF1A1	P68104
13	106911812	LOC106911812	N/A	N/A
13	106911810	slc17a5	S17A5	Q9NRA2
16	106915624	mef2a	MEF2A	Q02078
16	106916626	LOC106916626	MA1C1	Q9NR34
16	106918724	LOC106918724	ABTB2	Q8N961
16	106918979	LOC106918979	N/A	N/A
16	106921814	phldb2	PHLB2	Q86SQ0
16	106925861	naaladl1	NALDL	Q9UQQ1
16	106928160	nae1	ULA1	Q13564
16	106928170	ca7	CAH7	P43166
16	106929862	LOC106929862	N/A	N/A
16	106929881	LOC106929881	AT133	Q9H7F0
16	106932067	LOC106932067	NRX3A	Q9Y4C0
16	106903258	pde7a	PDE7A	Q13946
16	106904570	LOC106904570	HSPB1	P04792
16	106904563	LOC106904563	TAOK3	Q9H2K8
16	106909980	LOC106909980	SUSD3	Q96L08
16	106911204	LOC106911204	YPEL5	P62699
16	106911809	LOC106911809	N/A	N/A
16	106911796	kcna4	KCNA4	P22459
16	106913658	ehbp1	EHBP1	Q8NDI1
16	106914803	LOC106914803	ELOA1	Q14241
16	106915778	srl	SRCA	Q86TD4
16	106915838	rhpn2	RHPN2	Q8IUC4
16	106915916	LOC106915916	NKAI4	Q8IVV8
16	106916053	nr1h4	NR1H4	Q96RI1
16	106916230	LOC106916230	CP46A	Q9Y6A2
16	106916229	LOC106916229	CP46A	Q9Y6A2
16	106916562	LOC106916562	CX6B1	P14854
16	106916563	LOC106916563	GTR1	P11166
16	106916625	LOC106916625	DEN2A	Q9ULE3
16	106917355	LOC106917355	N/A	N/A
16	106917356	nisch	NISCH	Q9Y2I1
16	106917406	ccser1	CCSE1	Q9C0I3
16	106917426	tmem141	TM141	Q96I45
16	106917427	zmynd19	ZMY19	Q96E35
16	106917637	LOC106917637	FA5	P12259
16	106917779	LOC106917779	CP2J2	P51589
16	106917754	LOC106917754	CP2J2	P51589
16	106918227	LOC106918227	BAIP2	Q9UQB8
16	106918615	LOC106918615	QCR7	P14927
16	106919100	cdh8	CADH8	P55286
16	106919272	LOC106919272	RHG26	Q9UNA1
16	106919460	otud7b	OTU7B	Q6GQQ9
16	106919525	ypel1	YPEL2	Q96QA6
16	106920154	LOC106920154	SEM3D	O95025
16	106920268	stx8	STX8	Q9UNK0
16	106920269	LOC106920269	TBC24	Q9ULP9
16	106920465	LOC106920465	FA20C	Q8IXL6
16	106921220	LOC106921220	TS1R1	Q7RTX1
16	106921605	mtcl1	MTCL1	Q9Y4B5
16	106921664	LOC106921664	VPREB	P12018
16	106921667	LOC106921667	KV120	P01612
16	106921666	LOC106921666	KV104	P01596
16	106921926	plxna1	PLXA1	Q9UIW2
16	106922174	rb1	LPAR6	P43657
16	106922178	LOC106922178	LPAR6	P43657
16	106922370	LOC106922370	TMM65	Q6PI78
16	106922717	LOC106922717	PAR11	Q9NR21
16	106922842	cacna1a	CAC1A	O00555
16	106923283	LOC106923283	CLC11	Q9Y240
16	106923284	clec11a	CLC11	Q9Y240
16	106923695	det1	DET1	Q7L5Y6
16	106924029	LOC106924029	ZN106	Q9H2Y7
16	106924505	gcnt1	GCNT1	Q02742
16	106924574	zbtb46	ZBT46	Q86UZ6
16	106924627	LOC106924627	PCDGM	Q9Y5F6
16	106924634	LOC106924634	PCDGM	Q9Y5F6
16	106925291	LOC106925291	CXAR	P78310
16	106925292	LOC106925292	N/A	N/A
16	106925636	sept8	Sept11	Q9NVA2
16	106926006	cd83	N/A	N/A
16	106926013	LOC106926013	N/A	N/A
16	106926061	lcat	LCAT	P04180
16	106926236	ddc	DDC	P20711
16	106926693	LOC106926693	TPPP3	Q9BW30
16	106926690	LOC106926690	TRI16	O95361
16	106926744	LOC106926744	RO52	P19474
16	106926869	LOC106926869	ANO5	Q75V66
16	106927656	LOC106927656	JUNB	P17275
16	106927698	LOC106927698	KKCC1	Q8N5S9
16	106927771	brip1	FANCJ	Q9BX63
16	106927768	LOC106927768	POK19	Q9WJR5
16	106927767	ppm1d	PPM1D	O15297
16	106927766	appbp2	APBP2	Q92624
16	106928155	LOC106928155	NRAM2	P49281
16	106928252	LOC106928252	PM34	O43808
16	106928250	dxo	DXO	O77932
16	106928253	stk19	STK19	P49842
16	106928311	LOC106928311	N/A	N/A
16	106928494	itpk1	ITPK1	Q13572
16	106929092	tecta	TECTA	O75443
16	106929089	sc5d	SC5D	O75845
16	106929343	dab1	DAB1	O75553
16	106929344	c8b	CO8B	P07358
16	106930150	LOC106930150	SNX27	Q96L92
16	106930263	zfyve28	LST2	Q9HCC9
16	106930703	thada	THADA	Q6YHU6
16	106930826	alx1	ALX1	Q15699
16	106931014	LOC106931014	N/A	N/A
16	106931017	LOC106931017	N/A	N/A
16	106931038	LOC106931038	ACSL6	Q9UKU0
16	106931207	LOC106931207	MEF2B	Q02080
16	106931350	LOC106931350	FGD5	Q6ZNL6
16	106902998	trnae-cuc	N/A	N/A
16	106931352	LOC106931352	ITIH3	Q06033
16	106931400	kif21a	KI21A	Q7Z4S6
16	106931649	LOC106931649	B3GN7	Q8NFL0
16	106931647	armc9	ARMC9	Q7Z3E5
16	106931963	LOC106931963	IRPL1	Q9NZN1
16	106932457	jph2	JPH2	Q9BR39
16	106932503	LOC106932503	SSR2	P30874
16	106932551	LOC106932551	CAPON	O75052
16	106932550	LOC106932550	CAPON	O75052
16	106932844	LOC106932844	PYC	P11498
16	106932973	LOC106932973	N/A	N/A
16	106933811	LOC106933811	S4A10	Q6U841
16	106933978	LOC106933978	N/A	N/A
16	106933977	LOC106933977	TECTA	O75443
16	106903975	doc2b	DOC2B	Q14184
16	106904087	LOC106904087	SO3A1	Q9UIG8
16	106904242	LOC106904242	CNTRL	Q7Z7A1
16	106902981	trnaa-agc	N/A	N/A
16	106904244	LOC106904244	TTI2	Q6NXR4
16	106904241	tti2	TTI2	Q6NXR4
16	106904610	abcc3	MRP3	O15438
16	106905820	LOC106905820	AKP13	Q12802
16	106906431	LOC106906431	OLFM4	Q6UX06
16	106906427	LOC106906427	OLFM4	Q6UX06
16	106906859	LOC106906859	N/A	N/A
16	106907751	LOC106907751	ADK	P55263
16	106907753	LOC106907753	DUPD1	Q68J44
16	106907754	LOC106907754	DUPD1	Q68J44
16	106907757	LOC106907757	DS13A	Q6B8I1
16	106908987	LOC106908987	MRP3	O15438
16	106909549	LOC106909549	RDH11	Q8TC12
16	106909600	LOC106909600	HRH2	P25021
16	106909599	LOC106909599	HRH2	P25021
16	106910256	slc5a6	SC5A6	Q9Y289
16	106910738	LOC106910738	ACHA7	P36544
16	106911013	LOC106911013	HIPL1	Q96JK4
18	106903976	LOC106903976	IKZF5	Q9H5V7
18	106906182	LOC106906182	CADH3	P22223
18	106913880	swt1	SWT1	Q5T5J6
18	106914882	LOC106914882	ARP3	P61158
18	106915373	mrc1	MRC1	P22897
18	106915356	tmem236	TM236	Q5W0B7
18	106915482	sox10	KCJ12	Q14500
18	106915481	kcnj4	KCJ12	Q14500
18	106915471	LOC106915471	TRI16	O95361
18	106917131	LOC106917131	NBEA	Q8NFP9
18	106917140	LOC106917140	N/A	N/A
18	106917676	lsr	ILDR2	Q71H61
18	106917693	LOC106917693	TRYB2	P20231
18	106918896	fgf14	FGF14	Q92915
18	106918989	prdm6	GIMA4	Q9NUV9
18	106920137	evi5	EVI5	O60447
18	106920138	gfi1	GFI1	Q99684
18	106920139	LOC106920139	GLMN	Q92990
18	106920140	LOC106920140	CA146	Q5VVC0
18	106920141	kiaa1107	K1107	Q9UPP5
18	106920384	mark3	MARK3	P27448
18	106920963	LOC106920963	RPGF6	Q8TEU7
18	106920962	fnip1	FNIP1	Q8TF40
18	106920965	LOC106920965	ACSL6	Q9UKU0
18	106920967	LOC106920967	IRF2	P14316
18	106921138	LOC106921138	LAR1B	Q659C4
18	106921334	LOC106921334	NHS	Q6T4R5
18	106921788	LOC106921788	KI26B	Q2KJY2
18	106923772	megf6	MEGF6	O75095
18	106924948	LOC106924948	N/A	N/A
18	106925868	mrpl12	RM12	P52815
18	106925869	LOC106925869	CP013	Q96S19
18	106927909	LOC106927909	MFRN1	Q9NYZ2
18	106928715	LOC106928715	MRC1	P22897
18	106928714	LOC106928714	N/A	N/A
18	106929160	uaca	UACA	Q9BZF9
18	106929516	LOC106929516	N/A	N/A
18	106929631	LOC106929631	MFAP2	P55001
18	106929635	LOC106929635	SDHB	P21912
18	106929636	mrpl20	RM20	Q9BYC9
18	106929637	atad3a	ATD3A	Q9NVI7
18	106931649	LOC106931649	B3GN7	Q8NFL0
18	106931892	LOC106931892	N/A	N/A
18	106931894	rpl7	RL7	P18124
18	106932108	LOC106932108	VWA7	Q9Y334
18	106932235	LOC106932235	SC5A1	P13866
18	106932231	LOC106932231	SC5A1	P13866
18	106932638	LOC106932638	AT8B2	P98198
18	106932751	LOC106932751	CO3	P01024
18	106903385	rasgrp3	GRP3	Q8IV61
18	106904192	LOC106904192	TGM2	P21980
18	106904244	LOC106904244	TTI2	Q6NXR4
18	106904241	tti2	TTI2	Q6NXR4
18	106904248	slc18a1	VMAT1	P54219
18	106904238	LOC106904238	DKK1	O94907
18	106904245	LOC106904245	PPIE	Q9UNP9
18	106904246	LOC106904246	N/A	N/A
18	106904239	LOC106904239	ZMIZ2	Q8NF64
18	106905011	cat	CATA	P04040
18	106905273	rps6ka3	KS6A3	P51812
18	106905267	LOC106905267	IF1AX	P47813
18	106905266	LOC106905266	CX023	A2AJT9
18	106905263	LOC106905263	GPC6A	Q5T6X5
18	106906362	LOC106906362	ZN568	Q3ZCX4
18	106906364	LOC106906364	Z585A	Q6P3V2
18	106906366	LOC106906366	ZN568	Q3ZCX4
18	106906367	LOC106906367	OZF	Q15072
18	106907364	LOC106907364	N/A	N/A
18	106907957	LOC106907957	MAP1A	P78559
18	106907959	LOC106907959	ZNF84	P51523
18	106908425	LOC106908425	ASGL1	Q7L266
18	106911479	LOC106911479	GLP1R	P43220
18	106912199	LOC106912199	APOL3	O95236
24	106928441	soat2	SOAT1	P35610
24	106932355	spag9	JIP4	O60271
24	106906765	LOC106906765	S14L1	Q92503
24	106913728	LOC106913728	MDHC	P40925
24	106913710	wdpcp	IF2A	P05198
24	106916751	LOC106916751	CNT3B	Q96NU0
24	106917193	fbrsl1	AUTS2	Q8WXX7
24	106917450	kptn	KPTN	Q9Y664
24	106918258	LOC106918258	PRLHR	P49683
24	106918276	LOC106918276	T132B	Q14DG7
24	106918720	rtkn	RTKN	Q9BST9
24	106918726	LOC106918726	SMN	Q16637
24	106920150	LOC106920150	CP1A1	P04798
24	106920151	LOC106920151	CCBE1	Q6UXH8
24	106920271	LOC106920271	UBP31	Q70CQ4
24	106921212	LOC106921212	IIGP5	Q6NXR0
24	106921213	mocs1	MOCS1	Q9NZB8
24	106921746	acaa2	THIM	P42765
24	106921749	rpl6	RL6	Q02878
24	106922674	LOC106922674	UD2A1	Q9Y4X1
24	106922670	LOC106922670	UD2A1	Q9Y4X1
24	106922672	LOC106922672	UD2A1	Q9Y4X1
24	106922669	LOC106922669	UD2A1	Q9Y4X1
24	106922941	fam177a1	F177A	Q8N128
24	106922944	ppp2r3c	P2R3C	Q969Q6
24	106923452	LOC106923452	CADH4	P55283
24	106924681	LOC106924681	TSH1	Q6ZSZ6
24	106925142	LOC106925142	BAX	Q07812
24	106925954	LOC106925954	KC1G2	P78368
24	106926007	LOC106926007	CH037	Q96NL8
24	106902969	trnas-aga	N/A	N/A
24	106926083	LOC106926083	CCD63	Q8NA47
24	106926206	LOC106926206	CRTAP	O75718
24	106926204	adam11	ADA11	O75078
24	106927465	pgs1	PGPS1	Q32NB8
24	106927604	lrrk1	LRRK1	Q38SD2
24	106928306	LOC106928306	ABI1	Q8IZP0
24	106928308	LOC106928308	ABI1	Q8IZP0
24	106928301	LOC106928301	GP158	Q5T848
24	106928461	LOC106928461	CRP	P02741
24	106928613	mettl14	MET14	Q9HCE5
24	106928752	LOC106928752	PI3R5	Q8WYR1
24	106929050	LOC106929050	N/A	N/A
24	106929054	LOC106929054	ZEP3	Q5T1R4
24	106930789	LOC106930789	N/A	N/A
24	106930788	LOC106930788	N/A	N/A
24	106931629	trpa1	TRPA1	O75762
24	106931894	rpl7	RL7	P18124
24	106931891	rdh10	RDH10	Q8IZV5
24	106932125	LOC106932125	F1892	Q15884
24	106933670	LOC106933670	ABCA4	P78363
24	106933703	LOC106933703	PTPRD	P23468
24	106933967	LOC106933967	TDG	Q13569
24	106934024	LOC106934024	LEGL	Q3ZCW2
24	106934027	LOC106934027	S29A2	Q14542
24	106934026	LOC106934026	N/A	N/A
24	106906768	LOC106906768	HS3SB	Q9Y662
24	106906769	LOC106906769	GS1L2	A8MUP6
24	106907786	LOC106907786	SPS1	P49903
24	106907784	ap4b1	AP4B1	Q9Y6B7
24	106909222	rufy2	RUFY2	Q8WXA3
24	106911407	LOC106911407	CI084	Q5VXU9
24	106911409	LOC106911409	TAL2	Q16559
25	106918686	LOC106918686	RYR2	Q92736
25	106915047	erp27	ERP27	Q96DN0
25	106914110	LOC106914110	N/A	N/A
25	106914150	LOC106914150	N/A	N/A
25	106914157	cd3e	N/A	N/A
25	106914158	LOC106914158	N/A	N/A
25	106914156	tmem25	TMM25	Q86YD3
25	106914751	LOC106914751	GBRB3	P28472
25	106914884	LOC106914884	E2AK2	P19525
25	106917887	LOC106917887	SYTC	P26639
25	106918566	cystm1	N/A	N/A
25	106918567	LOC106918567	OR4K5	Q8NGD3
25	106918540	LOC106918540	O51E1	Q8TCB6
25	106918573	LOC106918573	DTBP1	Q96EV8
25	106918578	LOC106918578	CAD26	Q8IXH8
25	106919596	LOC106919596	CP27A	Q02318
25	106920893	tmem182	TM182	Q6ZP80
25	106920896	mfsd9	MFSD9	Q8NBP5
25	106923186	LOC106923186	N/A	N/A
25	106923948	abi1	ABI2	Q9NYB9
25	106924024	LOC106924024	N/A	N/A
25	106924251	immp1l	IMP1L	Q96LU5
25	106924249	elp4	ELP4	Q96EB1
25	106924530	fuz	FUZZY	Q9BT04
25	106924537	LOC106924537	ALAT1	P24298
25	106925223	LOC106925223	SAMD9	Q5K651
25	106929247	col4a6	CO4A2	P08572
25	106931418	LOC106931418	ZN710	Q8N1W2
25	106933261	LOC106933261	N/A	N/A
25	106933943	nrbp2	NRBP	Q9UHY1
25	106904585	LOC106904585	N/A	N/A
25	106904583	LOC106904583	CU062	Q9NYP8
25	106907522	LOC106907522	APBA1	Q02410
25	106907521	apba1	APBA1	Q02410
25	106911664	LOC106911664	N/A	N/A
